# Supplementary material for: Local T/B cooperation in inflamed tissues is supported by T follicular helper-like cells
Source: PubMed Central journal article supplement (PMC4773445; doi:10.1038/ncomms10875), 2016-02-26
Supplement: ncomms10875-s1.pdf [file ncomms10875-s1.pdf]

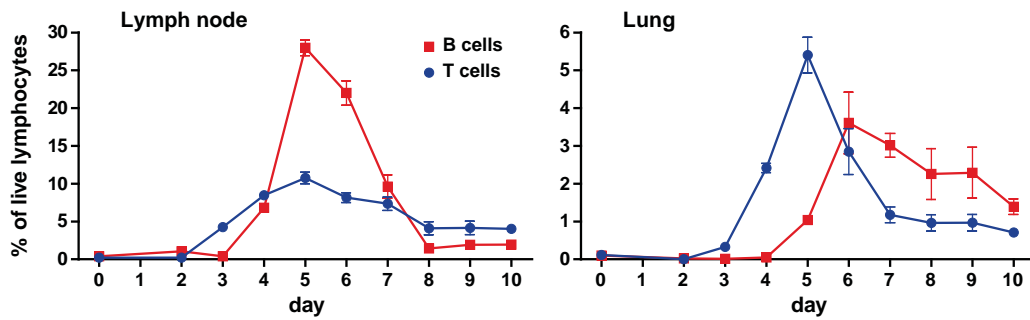

**Supplementary Fig. 1: Kinetics of T and B cell expansion in lymph node and lung.**

Naive OT-II T cells and B1-8i B cells were adoptively transferred into C57BL/6 recipients, immunized intranasally with NP-OVA on day 0 and 1. Frequencies of transgenic T and B cells in lung-draining lymph node and lung tissue were tracked by flow cytometry. Mean cell frequencies (error bars show SEM) from 3-5 animals per time point and a representative experiment out of two are shown.

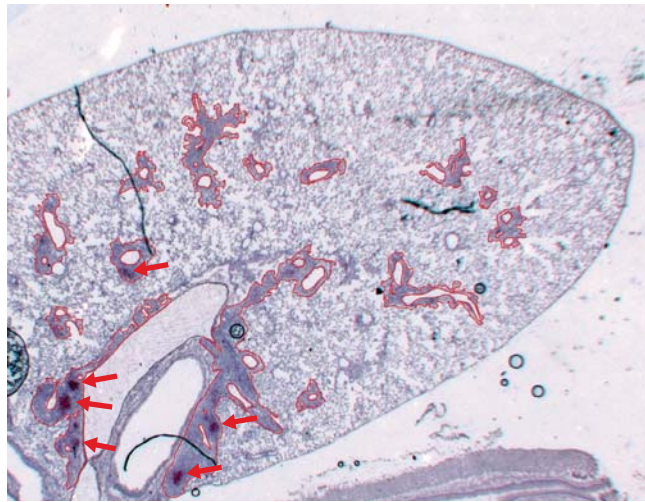

**Supplementary Fig. 2: Quantification of FDC-positive areas.**

Lungs from two animals were sectioned at different depth and stained for CD21/35 to visualize FDC and hematoxylin to quantify lymphocytic infiltrates. A consecutive section was stained for antigen-specific B cells to prove that all infiltrates contained B cells (data not shown). The total area of infiltrates (red lines) and FDC-positive regions (arrows) was quantified using Zeiss AxioVision software.

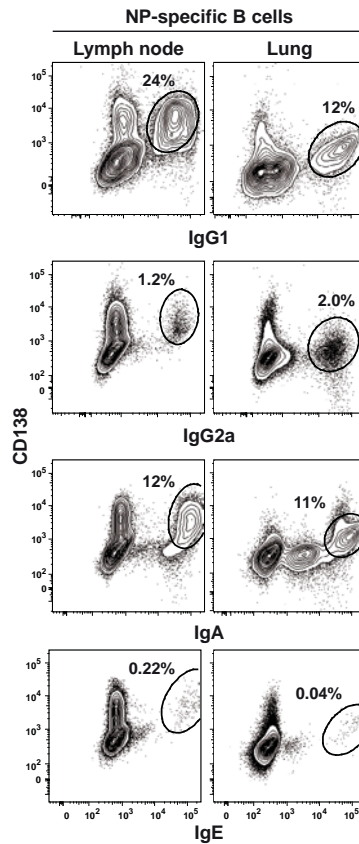

**Supplementary Fig. 3: Analysis of immunoglobulin subclasses.**

Flow-cytometric analysis (day 17) of antigen-specific B cells from lung-draining lymph nodes and lung tissue. Cells were stained for CD138 and intracellular IgG1, IgG2a, IgA, or IgE. Representative result from two independent experiments with 14 animals.

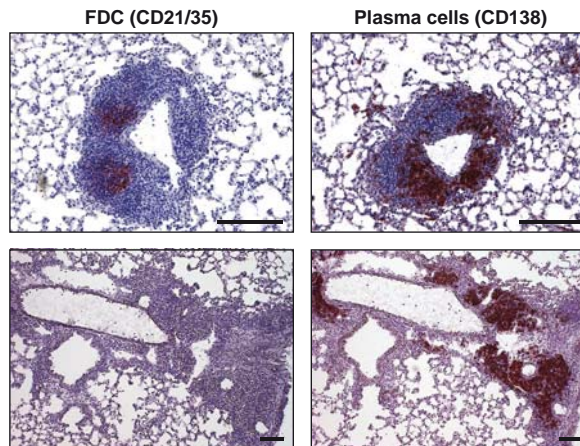

**Supplementary Fig. 4: Plasma cells can be found in FDC-positive and negative areas.**

Cryosections from inflamed lung-tissue were stained for CD21/35 and CD138. The top row shows serial sections from a FDC-positive and the bottom row from a FDC-negative infiltrate. The bar scales indicate 200 μm.

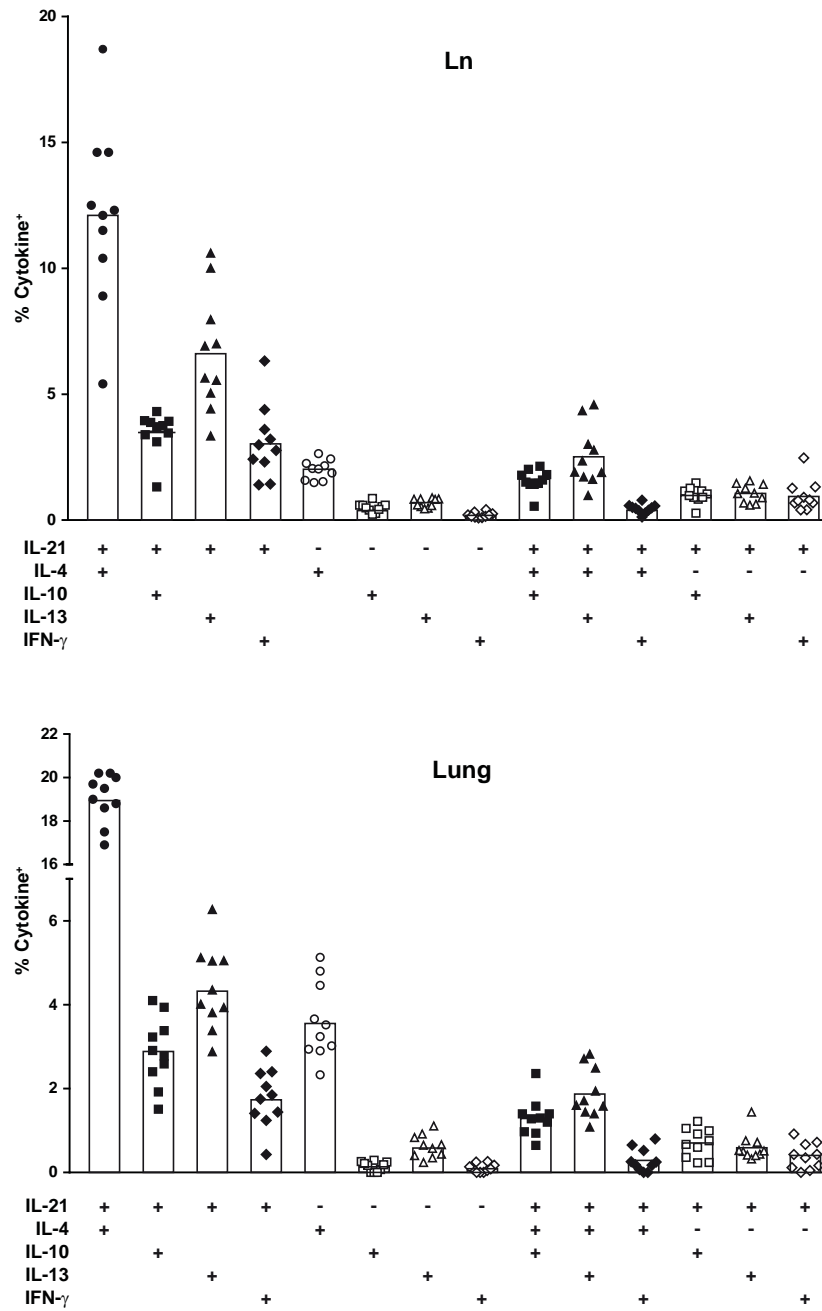

**Supplementary Fig. 5: Analysis of cytokine coexpression.**

Lung and lung-draining lymph node cells were isolated from a day 17 airway inflammation. Cells were restimulated with OVA-peptide in vitro and antigen-specific T cells were analysed for cytokine production by intracellular staining. Shown is the percentage of T cells expressing the combination of two or three cytokines as indicated. Representative result from 2 independent experiments with 17 animals.

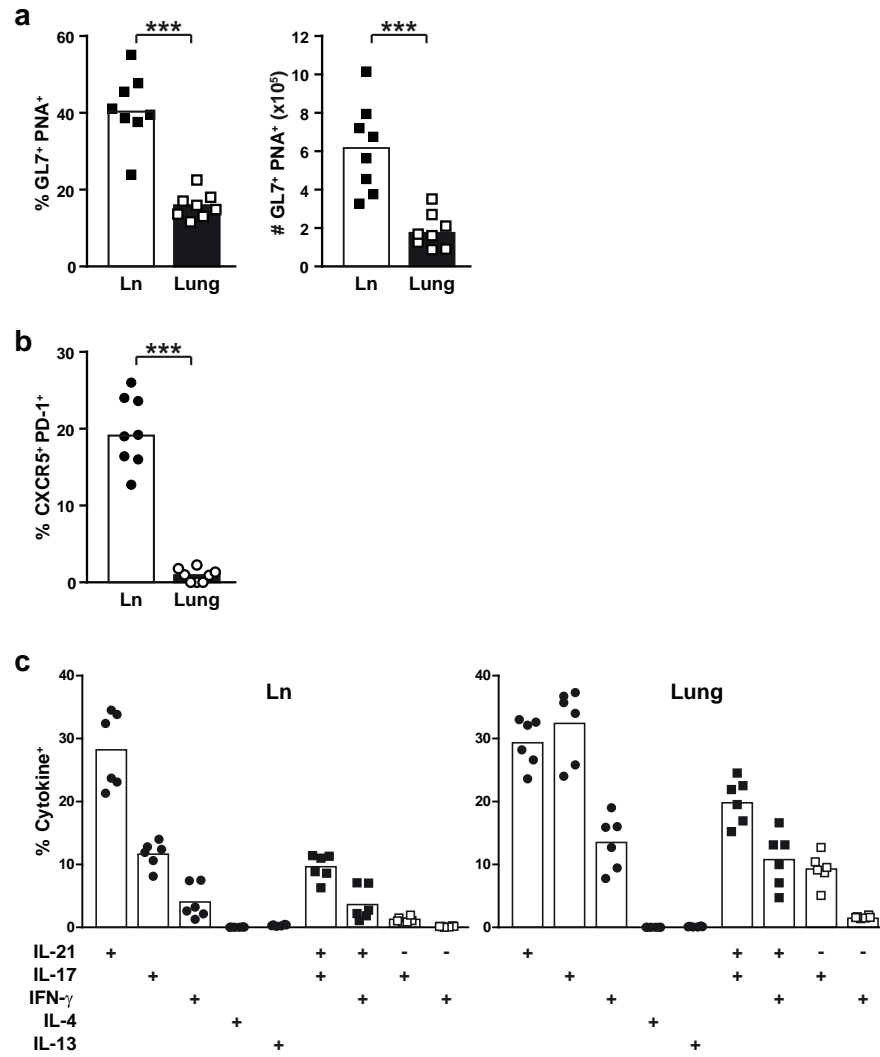

**Supplementary Fig. 6: Airway inflammation model with adoptive transfer of naive T cells.**

OT-II T cells and B1-8i B cells were co-transferred into C57BL/6 recipients as shown in Fig. 1a except that T cells were not pre-activated in vitro. Mice were challenged with 20  $\mu$ g NP-OVA + 5  $\mu$ g LPS on day 0 and 1, and 5  $\mu$ g NP-OVA + 5  $\mu$ g LPS on day 10, 13, 16. Lung-draining lymph nodes and lung tissue were analysed on day 20. **(a)** Antigen-specific B cells were analysed for a GC-like phenotype as shown in Fig. 3b. **(b)** Antigen-specific T cells were stained with anti-CXCR5 and PD-1 as shown in Fig. 4a. **(c)** Cells were restimulated with OVA-peptide in vitro and antigen-specific T cells were analysed for cytokine production as shown in Fig. 4c. Shown is the percentage of T cells expressing a single cytokine or the combination of two cytokines. Similar results were obtained using Smarta T cell receptor transgenic T cells instead of OT-II.

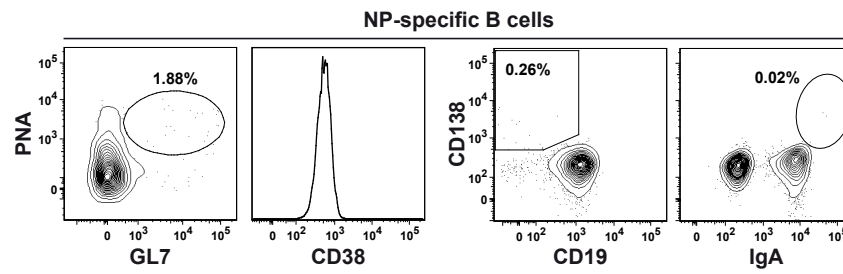

**Supplementary Fig. 7: Memory B cells in the lung are no GC or plasma cells.**

Flow cytometric characterization of lung-resident antigen-specific B cells at day 41. Representative stainings for the GC B cell marker PNA, GL7, CD38 and the plasma cell marker CD138 in combination with CD19 or IgA on permeabilised cells are shown.

**Supplementary Table I: Antibodies used for flow cytometry**

| Specificity | Clone      | Conjugate            | Supplier            | Concentration |
|-------------|------------|----------------------|---------------------|---------------|
| CD3         | KT3        | Pacific Orange       | own conjugate       | 2 µg/ml       |
| CD4         | YTS 191.1  | Alexa Fluor 700      | own conjugate       | 0.75 µg/ml    |
| CD4         | RM4-5      | Brilliant Violet 711 | BioLegend           | 0.25 µg/ml    |
| CD8         | 53-6.72    | APC-eFluor 780       | eBioscience         | 0.5 µg/ml     |
| CD19        | 6D5        | APC-Cy7              | BioLegend           | 0.5 µg/ml     |
| CD19        | 6D5        | Brilliant Violet 785 | BioLegend           | 1:400         |
| CD38        | 90         | Pacific Blue         | BioLegend           | 0.625 µg/ml   |
| CD40L       | MR1        | PE                   | BioLegend           | 2 µg/ml       |
| B220        | RA3-6B2    | APC-Cy7              | BioLegend           | 0.25 µg/ml    |
| CD45.1      | A20        | PE-Cy7               | BioLegend           | 0.5 µg/ml     |
| CD45.2      | 104        | Alexa Fluor 700      | BioLegend           | 1.25 µg/ml    |
| CD69        | H1.2F3     | PerCP                | BioLegend           | 2 µg/ml       |
| CD73        | TY/11.8    | Brilliant Violet 605 | BioLegend           | 1:200         |
| CD80        | 16-10A1    | Cy5                  | own conjugate       | 0.75 µg/ml    |
| Thy-1.1     | OX-7       | Alexa Fluor 700      | own conjugate       | 0.3 µg/ml     |
| Thy-1.1     | OX-7       | Pacific Blue         | own conjugate       | 0.2 µg/ml     |
| CD138       | 281-2      | PE                   | BD Biosciences      | 0.25 µg/ml    |
| CXCR5       | 2G8        | Biotin               | BD Biosciences      | 5 µg/ml       |
| CCR7        | 4B12       | Biotin               | BioLegend           | 2.5 µg/ml     |
| PD-1        | J43        | PE                   | eBioscience         | 1 µg/ml       |
| PD-L2       | TY25       | PE                   | eBioscience         | 2 µg/ml       |
| ICOS        | MIC-2043   | Alexa Fluor 647      | own conjugate       | 0.375 µg/ml   |
| IgD         | 11-26c     | Alexa Fluor 647      | own conjugate       | 0.375 µg/ml   |
| IgM         | Bet-2      | Biotin               | own conjugate       | 2 µg/ml       |
| IgG1        | A85-1      | PE-CF594             | BD Biosciences      | 0.5 µg/ml     |
| IgG1        | LO-MG1-2   | FITC                 | Serotec             | 0.3 µg/ml     |
| IgG2a       | LO-MG2a-9  | FITC                 | Serotec             | 0.1 µg/ml     |
| IgA         | C10-3      | FITC                 | BD Biosciences      | 0.15 µg/ml    |
| IgE         | R35-72     | FITC                 | BD Biosciences      | 0.625 µg/ml   |
| GC B cells  | GL7        | Alexa Fluor 647      | own conjugate       | 0.375 µg/ml   |
| GC B cells  | PNA        | FITC                 | Vector Laboratories | 1.25 µg/ml    |
| IL-4        | BVD6-24G2  | PE-Cy7               | eBioscience         | 0.125 µg/ml   |
| IL-5        | TRFK5      | APC                  | own conjugate       | 0.25 µg/ml    |
| IL-10       | JES5-2A5   | PE                   | own conjugate       | 1 µg/ml       |
| IL-13       | 38213.11   | Pacific Blue         | own conjugate       | 1.25 µg/ml    |
| IL-17       | TC11-18H10 | Alexa Fluor 700      | BioLegend           | 0.625 µg/ml   |
| IL-21       | IL-21R-Fc  | unconjugated         | R&D Systems         | 1 µg/ml       |
| IFN-γ       | AN18.17.24 | FITC                 | own conjugate       | 0.375 µg/ml   |
| Bcl-6       | GI191E/A8  | PE                   | eBioscience         | 0.05 µg/ml    |
| Bcl-6       | K112-91    | Alexa Fluor 647      | BD Biosciences      | 1:50 µg/ml    |
| GATA-3      | TWAJ       | PE                   | eBioscience         | 0.06 µg/ml    |
| AID         | mAID-2     | unconjugated         | eBioscience         | 5 µg/ml       |
